# Supplementary material for: Factors Associated with COVID-19 Vaccination Promptness after Eligibility in a North Carolina Longitudinal Cohort Study
Source: MDPI journal article supplement (doi:10.3390/vaccines11111639), 2023-10-26
Supplement: s1 [file s1]

**Table S1:** Results from full Cox proportional hazards model.

| Characteristic                                | Param Est.<br>(Std. Err.) | Hazard Ratio (95% CI) | Joint Test<br>p-value | Pairwise<br>Comparison<br>p-value |
|-----------------------------------------------|---------------------------|-----------------------|-----------------------|-----------------------------------|
| Baseline Age (in decades, centered at age 65) | .18 (.04)                 | 1.20 (1.12 - 1.28)    | <b>.0001</b>          |                                   |
| Baseline Age <sup>2</sup>                     | .04 (.02)                 | 1.05 (1.01 - 1.08)    | <b>.0093</b>          |                                   |
| Sex (Male)                                    | -.05 (.07)                | .95 (.83 - 1.08)      | .4316                 |                                   |
| Minority Race (Yes)                           | -.17 (.15)                | .84 (.63 - 1.13)      | .2547                 |                                   |
| Hispanic (Yes)                                | .17 (.15)                 | 1.19 (.88 - 1.61)     | .2603                 |                                   |
| Educ2 (Some College or less)                  | -.22 (.07)                | .80 (.70 - .92)       | <b>.0021</b>          |                                   |
| Income2 (< \$50,000)                          | -.16 (.08)                | .86 (.73 - 1.00)      | <b>.0564</b>          |                                   |
| BMI2 (Obese/Sev.Obese)                        | -.08 (.07)                | .92 (.81 - 1.05)      | .2171                 |                                   |
| BL Vaccine Intention                          |                           |                       | <b>.0001</b>          |                                   |
| No                                            | -1.94 (.32)               | .14 (.08 - .27)       |                       | <b>.0001</b>                      |
| Unsure                                        | -.29 (.10)                | .75 (.61 - .91)       |                       | <b>.0046</b>                      |
| Minority Race*BL Vaccine Intention            |                           |                       | <b>.0034</b>          |                                   |
| Minority:Yes*VI:No                            | 1.11 (.33)                | 3.02 (1.59 - 5.75)    |                       | <b>.0007</b>                      |
| Minority:Yes*VI:Unsure                        | .23 (.20)                 | 1.26 (.85 - 1.87)     |                       | .2417                             |
| BL Vaccine Intention*Survival Time            |                           |                       | <b>.0535</b>          |                                   |
| VI:No*Survival Time                           | .03 (.09)                 | 1.03 (.87 - 1.23)     |                       | .6994                             |
| VI:Unsure*Survival Time                       | -.09 (.04)                | .92 (.85 - .99)       |                       | <b>.0235</b>                      |

**Table S2.** Characteristics of sample members who were vaccinated before their estimated eligibility date vs. those vaccinated after their estimated eligibility date.

| Variables                              | Total Vaccinated Sample (N=1130) | Vaccinated Before Eligibility (N=314) | Vaccinated After Eligibility (N=816) | p-value* |
|----------------------------------------|----------------------------------|---------------------------------------|--------------------------------------|----------|
| <b>COVID vaccine trial participant</b> |                                  |                                       |                                      | <.0001   |
| No                                     | 1065 (94.2%)                     | 282 (89.8%)                           | 783 (96.0%)                          |          |
| Yes                                    | 65 (5.8%)                        | 32 (10.2%)                            | 33 (4.0%)                            |          |
| <b>Baseline Age in years</b>           |                                  |                                       |                                      | 0.0090   |
| Mean±SD                                | 61.6±12.0                        | 63.1±12.6                             | 61.0±11.8                            |          |
| Min–Max                                | 27.0–98.0                        | 30.0–98.0                             | 27.0–94.0                            |          |
| <b>Sex</b>                             |                                  |                                       |                                      | 0.0200   |
| Female                                 | 785 (69.5%)                      | 202 (64.3%)                           | 583 (71.4%)                          |          |
| Male                                   | 345 (30.5%)                      | 112 (35.7%)                           | 233 (28.6%)                          |          |
| <b>Race</b>                            |                                  |                                       |                                      | 0.1987   |
| White                                  | 981 (87.5%)                      | 277 (89.6%)                           | 704 (86.7%)                          |          |
| Black                                  | 92 (8.2%)                        | 18 (5.8%)                             | 74 (9.1%)                            |          |
| Other                                  | 48 (4.3%)                        | 14 (4.5%)                             | 34 (4.2%)                            |          |
| <i>missing</i>                         | 9 (0.8%)                         | 5 (1.6%)                              | 4 (0.5%)                             |          |
| <b>Hispanic Ethnicity</b>              |                                  |                                       |                                      | 0.8673   |
| Non-Hispanic                           | 1069 (95.4%)                     | 297 (95.2%)                           | 772 (95.4%)                          |          |
| Hispanic                               | 52 (4.6%)                        | 15 (4.8%)                             | 37 (4.6%)                            |          |
| <i>missing</i>                         | 9 (0.8%)                         | 2 (0.6%)                              | 7 (0.9%)                             |          |
| <b>Education Level</b>                 |                                  |                                       |                                      | 0.1778   |
| HS or less                             | 72 (6.4%)                        | 12 (3.9%)                             | 60 (7.4%)                            |          |
| Some College                           | 235 (21.0%)                      | 70 (22.7%)                            | 165 (20.4%)                          |          |
| College Grad                           | 442 (39.5%)                      | 124 (40.3%)                           | 318 (39.3%)                          |          |
| Graduate School+                       | 369 (33.0%)                      | 102 (33.1%)                           | 267 (33.0%)                          |          |
| <i>missing</i>                         | 12 (1.1%)                        | 6 (1.9%)                              | 6 (0.7%)                             |          |
| <b>Household Income</b>                |                                  |                                       |                                      | 0.0809   |
| < 30,000                               | 84 (7.9%)                        | 13 (4.4%)                             | 71 (9.2%)                            |          |
| 30,000-49,999                          | 129 (12.1%)                      | 31 (10.5%)                            | 98 (12.7%)                           |          |
| 50,000-74,999                          | 182 (17.1%)                      | 54 (18.4%)                            | 128 (16.6%)                          |          |
| 75,000-89,999                          | 133 (12.5%)                      | 39 (13.3%)                            | 94 (12.2%)                           |          |
| 90,000+                                | 537 (50.4%)                      | 157 (53.4%)                           | 380 (49.3%)                          |          |

| Variables                               | Total Vaccinated<br>Sample<br>(N=1130) | Vaccinated Before<br>Eligibility<br>(N=314) | Vaccinated<br>After Eligibility<br>(N=816) | p-value* |
|-----------------------------------------|----------------------------------------|---------------------------------------------|--------------------------------------------|----------|
| <i>missing</i>                          | 65 (5.8%)                              | 20 (6.4%)                                   | 45 (5.5%)                                  |          |
| <b>BMI</b>                              |                                        |                                             |                                            | 0.1305   |
| Mean±SD                                 | 28.5±6.0                               | 28.1±5.9                                    | 28.7±6.1                                   |          |
| Min–Max                                 | 16.0–54.1                              | 17.5–54.1                                   | 16.0–53.7                                  |          |
| <i>missing (%)</i>                      | 28 (2.5%)                              | 11 (3.5%)                                   | 17 (2.1%)                                  |          |
| <b>BMI Group</b>                        |                                        |                                             |                                            | 0.4639   |
| Underweight (BMI < 18.5)                | 13 (1.2%)                              | 4 (1.3%)                                    | 9 (1.1%)                                   |          |
| Healthy (18.5 ≤ BMI < 25)               | 309 (28.0%)                            | 97 (32.0%)                                  | 212 (26.5%)                                |          |
| Overweight (25 ≤ BMI < 30)              | 411 (37.3%)                            | 109 (36.0%)                                 | 302 (37.8%)                                |          |
| Obese (30 ≤ BMI < 40)                   | 313 (28.4%)                            | 79 (26.1%)                                  | 234 (29.3%)                                |          |
| Severely Obese (BMI ≥ 40)               | 56 (5.1%)                              | 14 (4.6%)                                   | 42 (5.3%)                                  |          |
| <i>missing</i>                          | 28 (2.5%)                              | 11 (3.5%)                                   | 17 (2.1%)                                  |          |
| <b>Current Smoker</b>                   |                                        |                                             |                                            | 0.1116   |
| No                                      | 1088 (96.7%)                           | 306 (98.1%)                                 | 782 (96.2%)                                |          |
| Yes                                     | 37 (3.3%)                              | 6 (1.9%)                                    | 31 (3.8%)                                  |          |
| <i>missing</i>                          | 5 (0.4%)                               | 2 (0.6%)                                    | 3 (0.4%)                                   |          |
| <b>Baseline COVID Vaccine Intention</b> |                                        |                                             |                                            | 0.0003   |
| No                                      | 49 (4.4%)                              | 3 (1.0%)                                    | 46 (5.7%)                                  |          |
| Maybe/Unsure                            | 328 (29.7%)                            | 79 (26.0%)                                  | 249 (31.0%)                                |          |
| Yes                                     | 729 (65.9%)                            | 222 (73.0%)                                 | 507 (63.2%)                                |          |
| <i>missing</i>                          | 24 (2.1%)                              | 10 (3.2%)                                   | 14 (1.7%)                                  |          |

\* p-values are based on t-tests with Satterwaite-adjusted standard errors for continuous characteristics and likelihood ratio  $\chi^2$  tests of general association for categorical characteristics. Missing values are shown as a fraction of the group sample size, but not included in the statistical tests.
